# Supplementary material for: Serological Testing for COVID-19, Immunological Surveillance, and Exploration of Protective Antibodies
Source: PubMed Central journal article supplement (PMC8417107; doi:10.3389/fimmu.2021.635701), 2021-08-19
Supplement: DataSheet_1.pdf [file DataSheet_1.pdf]

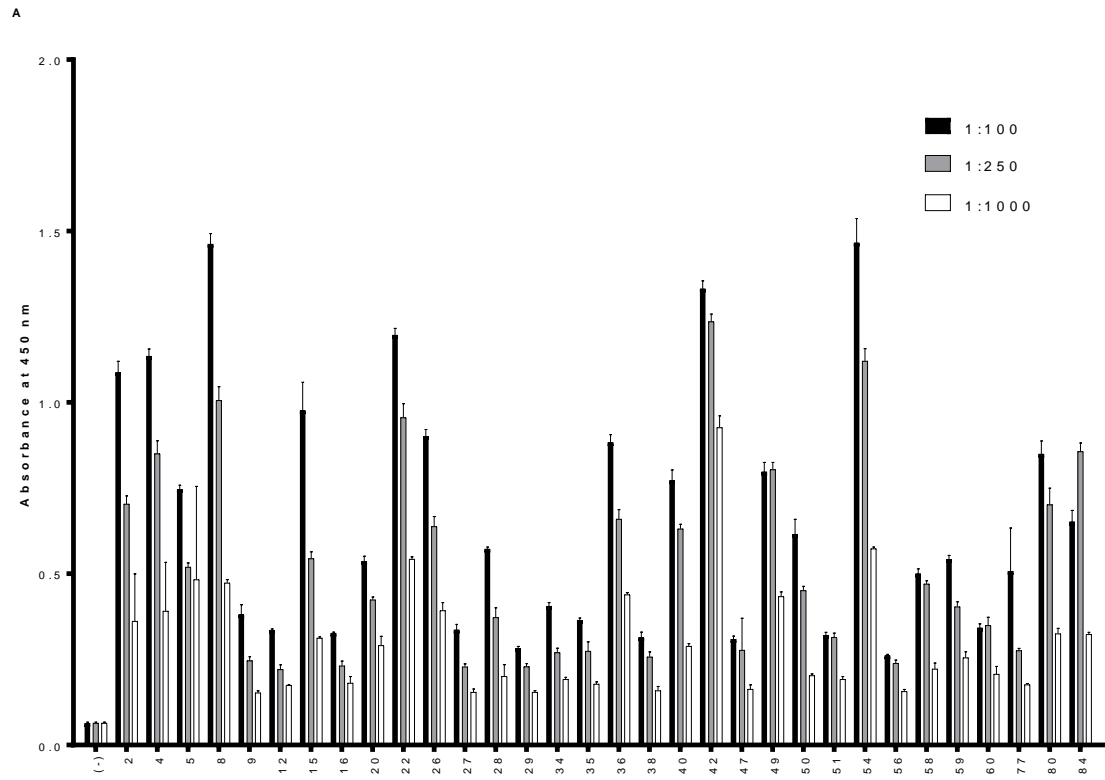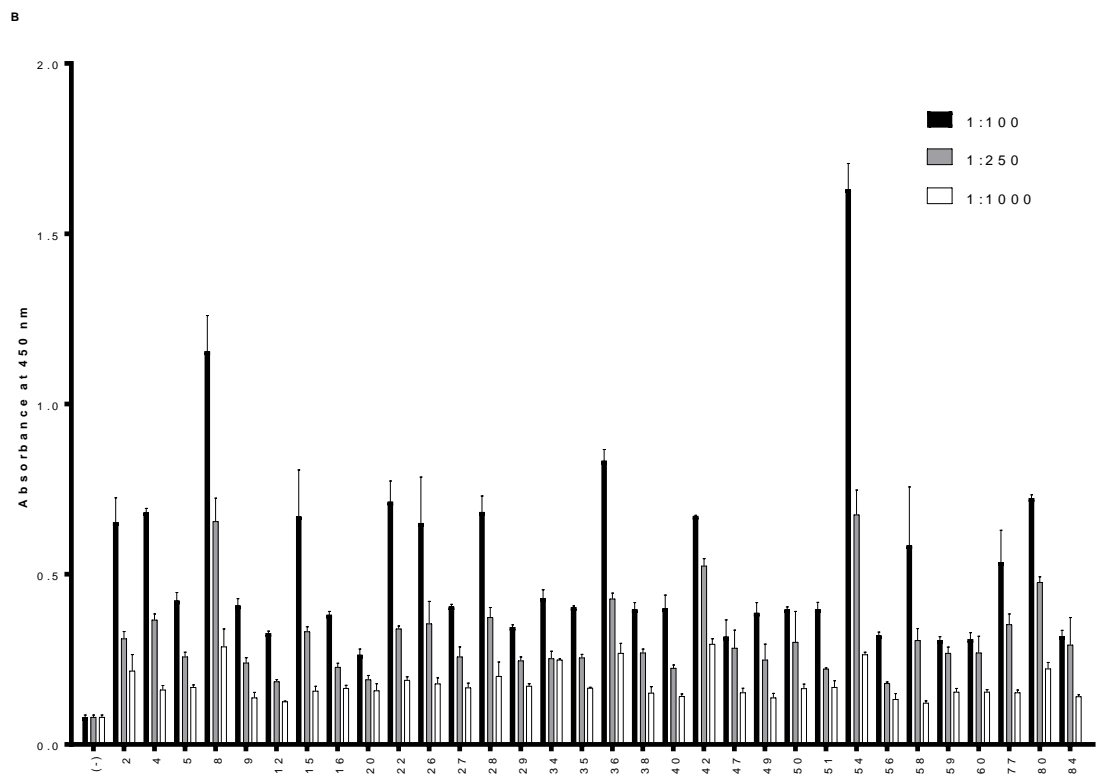

Figure S1 – ELISA using different serum dilutions. (A) N protein coated plates. (B) 3CL coated plates. (-) is the negative control reaction in the absence of serum.

| cut-off | N protein |      | 3CL protease |      |
|---------|-----------|------|--------------|------|
| factor  | sens      | spec | sens         | spec |
| 1       | 1         | 0.52 | 1            | 0.5  |
| 1.1     | 1         | 0.53 | 1            | 0.5  |
| 1.2     | 1         | 0.64 | 0.94         | 0.5  |
| 1.3     | 0.94      | 0.67 | 0.94         | 0.5  |
| 1.4     | 0.89      | 0.7  | 0.89         | 0.52 |
| 1.5     | 0.84      | 0.7  | 0.89         | 0.59 |
| 1.6     | 0.84      | 0.7  | 0.89         | 0.62 |
| 1.7     | 0.84      | 0.7  | 0.89         | 0.64 |
| 1.8     | 0.8       | 0.7  | 0.8          | 0.76 |
| 1.9     | 0.8       | 0.73 | 0.73         | 0.8  |
| 2       | 0.76      | 0.76 | 0.7          | 0.8  |

Figure S2 – Detection cut-off factor, sensitivity and specificity adjustment of ELISA. The table shows calculated sensitivity (sens) and specificity (spec) for each antigen (N protein or 3CL protease). The cut-off factor listed in the left column was applied over the value of NIS (negative immune serum) to setup detection cut-off.

| #  | PCR | LFA | ELISA |      | PRNT% |
|----|-----|-----|-------|------|-------|
| 2  | +   | +   | +     | 1,09 | 100   |
| 4  | +   | +   | +     | 1,14 | 97    |
| 5  | +   | +   | +     | 0,75 | 84    |
| 8  | +   | +   | +     | 1,46 | 92    |
| 9  | +   | -   | +     | 0,38 | 42    |
| 12 | -   | -   | -     | 0,34 | 3     |
| 15 | +   | +   | +     | 0,98 | 90    |
| 16 | -   | -   | -     | 0,33 | 55    |
| 20 | +   | +   | +     | 0,54 | 100   |
| 22 | +   | +   | +     | 1,20 | 100   |
| 26 | +   | +   | +     | 0,90 | 97    |
| 27 | -   | -   | -     | 0,34 | 11    |
| 28 | -   | -   | +     | 0,57 | 79    |
| 29 | -   | -   | -     | 0,28 | 48    |
| 34 | +   | -   | +     | 0,41 | 40    |
| 35 | -   | -   | +     | 0,37 | 66    |
| 36 | +   | +   | +     | 0,88 | 100   |
| 38 | -   | -   | -     | 0,31 | 16    |
| 40 | +   | +   | +     | 0,77 | 71    |
| 42 | +   | +   | +     | 1,33 | 100   |
| 47 | -   | -   | -     | 0,31 | 24    |
| 49 | +   | +   | +     | 0,80 | 100   |
| 50 | -   | +   | +     | 0,62 | 100   |
| 51 | -   | -   | -     | 0,32 | 6     |
| 54 | -   | +   | +     | 1,47 | 100   |
| 56 | -   | -   | -     | 0,26 | 23    |
| 58 | +   | +   | +     | 0,50 | 100   |
| 59 | -   | -   | +     | 0,54 | 100   |
| 60 | +   | -   | -     | 0,34 | 100   |
| 77 | -   | -   | +     | 0,51 | -2    |
| 80 | -   | -   | +     | 0,85 | 42    |
| 84 | -   | +   | +     | 0,86 | 100   |

Figure S3 – Comparison of ELISA and LFA.

| #  | PCR | LFA | ELISA |      | PRNT% |
|----|-----|-----|-------|------|-------|
| 2  | +   | +   | +     | 1,09 | 100   |
| 4  | +   | +   | +     | 1,14 | 97    |
| 5  | +   | +   | +     | 0,75 | 84    |
| 8  | +   | +   | +     | 1,46 | 92    |
| 9  | +   | -   | +     | 0,38 | 42    |
| 12 | -   | -   | -     | 0,34 | 3     |
| 15 | +   | +   | +     | 0,98 | 90    |
| 16 | -   | -   | -     | 0,33 | 55    |
| 20 | +   | +   | +     | 0,54 | 100   |
| 22 | +   | +   | +     | 1,20 | 100   |
| 26 | +   | +   | +     | 0,90 | 97    |
| 27 | -   | -   | -     | 0,34 | 11    |
| 28 | -   | -   | +     | 0,57 | 79    |
| 29 | -   | -   | -     | 0,28 | 48    |
| 34 | +   | -   | +     | 0,41 | 40    |
| 35 | -   | -   | +     | 0,37 | 66    |
| 36 | +   | +   | +     | 0,88 | 100   |
| 38 | -   | -   | -     | 0,31 | 16    |
| 40 | +   | +   | +     | 0,77 | 71    |
| 42 | +   | +   | +     | 1,33 | 100   |
| 47 | -   | -   | -     | 0,31 | 24    |
| 49 | +   | +   | +     | 0,80 | 100   |
| 50 | -   | +   | +     | 0,62 | 100   |
| 51 | -   | -   | -     | 0,32 | 6     |
| 54 | -   | +   | +     | 1,47 | 100   |
| 56 | -   | -   | -     | 0,26 | 23    |
| 58 | +   | +   | +     | 0,50 | 100   |
| 59 | -   | -   | +     | 0,54 | 100   |
| 60 | +   | -   | -     | 0,34 | 100   |
| 77 | -   | -   | +     | 0,51 | -2    |
| 80 | -   | -   | +     | 0,85 | 42    |
| 84 | -   | +   | +     | 0,86 | 100   |

Figure S4 – Serological assays reveal positive samples that were not detected by PCR.

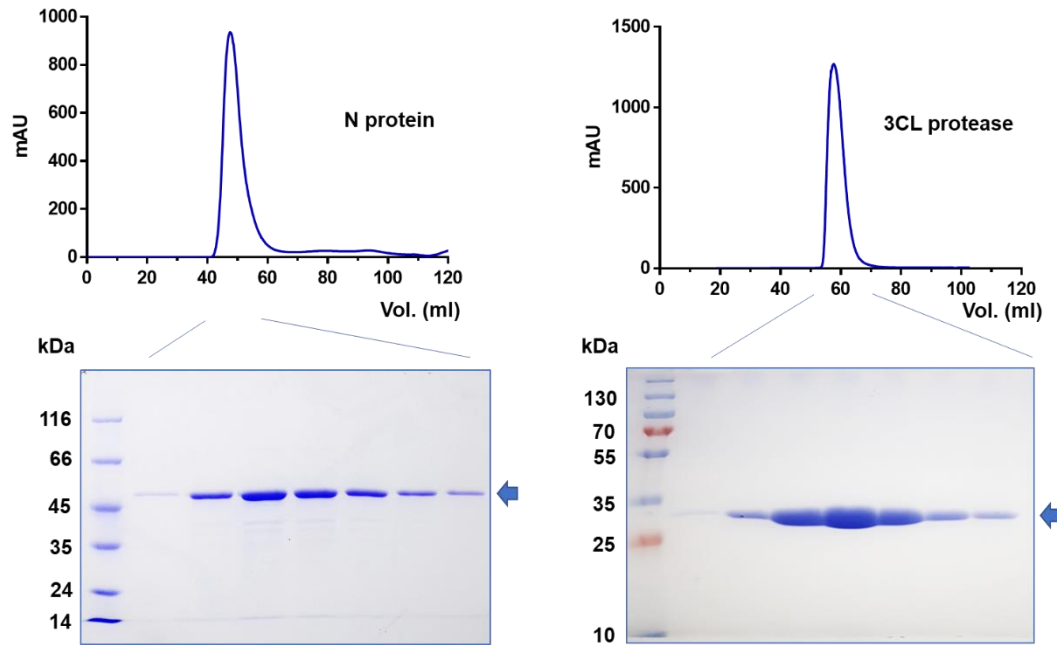

Figure S5 – The SARS-CoV-2 N and 3CL proteins as antigen. The recombinant N protein and 3CL protease produced in *E. coli* and purified by affinity chromatography were concentrated and subjected to size-exclusion chromatography, as the final purification step (upper panels). The purity of the protein fractions corresponding to the N and 3CL peaks were analyzed by SDS-PAGE (bottom panels). Arrows indicate the purified proteins used in the experiments.

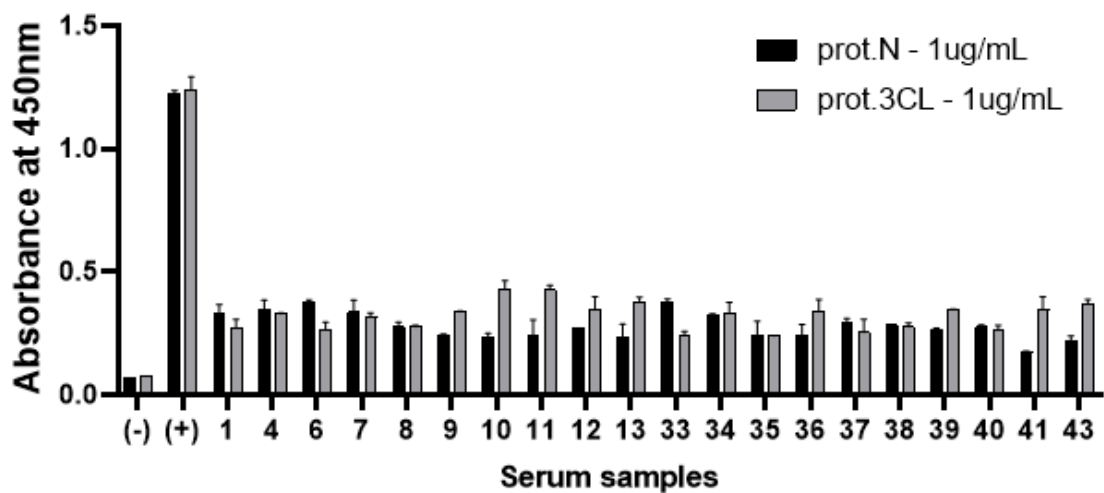

Figure S6 – ELISA of non-immune serum samples from healthy volunteers in 2019 (-) negative control; (+) positive control; Numbers from 1 to 43: human serum samples.
